# Supplementary material
Source: publisher site journal article supplement (https://www.dovepress.com/article/265372)
Supplement: Supplementary file 1 [file get_supplementary_file.php]

**Supplementary Table1 . PCR Primer sequence**

| **Target ID** | **Primer** | **sequence (5'-3')** |
| --- | --- | --- |
| ESRRA | Forward  Reverse | TCAAAGAGGTCACAGAGGGTAG  CAATGAGTGTGAGATCACC |
| GPER-1 | Forward  Reverse | GCCACATCTGACCGCAGTTTA  TGGGGAAGAGGCCACCA |
| ACTB | Forward  Reverse | CTACCTCATGAAGATCCTCACCGA  TTCTCCTTAATGTCACGCACGATT |
| GAPDH | Forward  Reverse | GGACCTGACCTGCCGTCTAG  GTAGCCCAGGATGCCCTTGA |

**Supplementary Figure 1. Correlation analysis between the expression of ERRα and GPER in TNBCs (n=199).** IR-ERRα, immunoreactive score of ERRα; IR-GPER, immunoreactive score of GPER. Two-tailed p<0.05 is considered statistically significant.

**
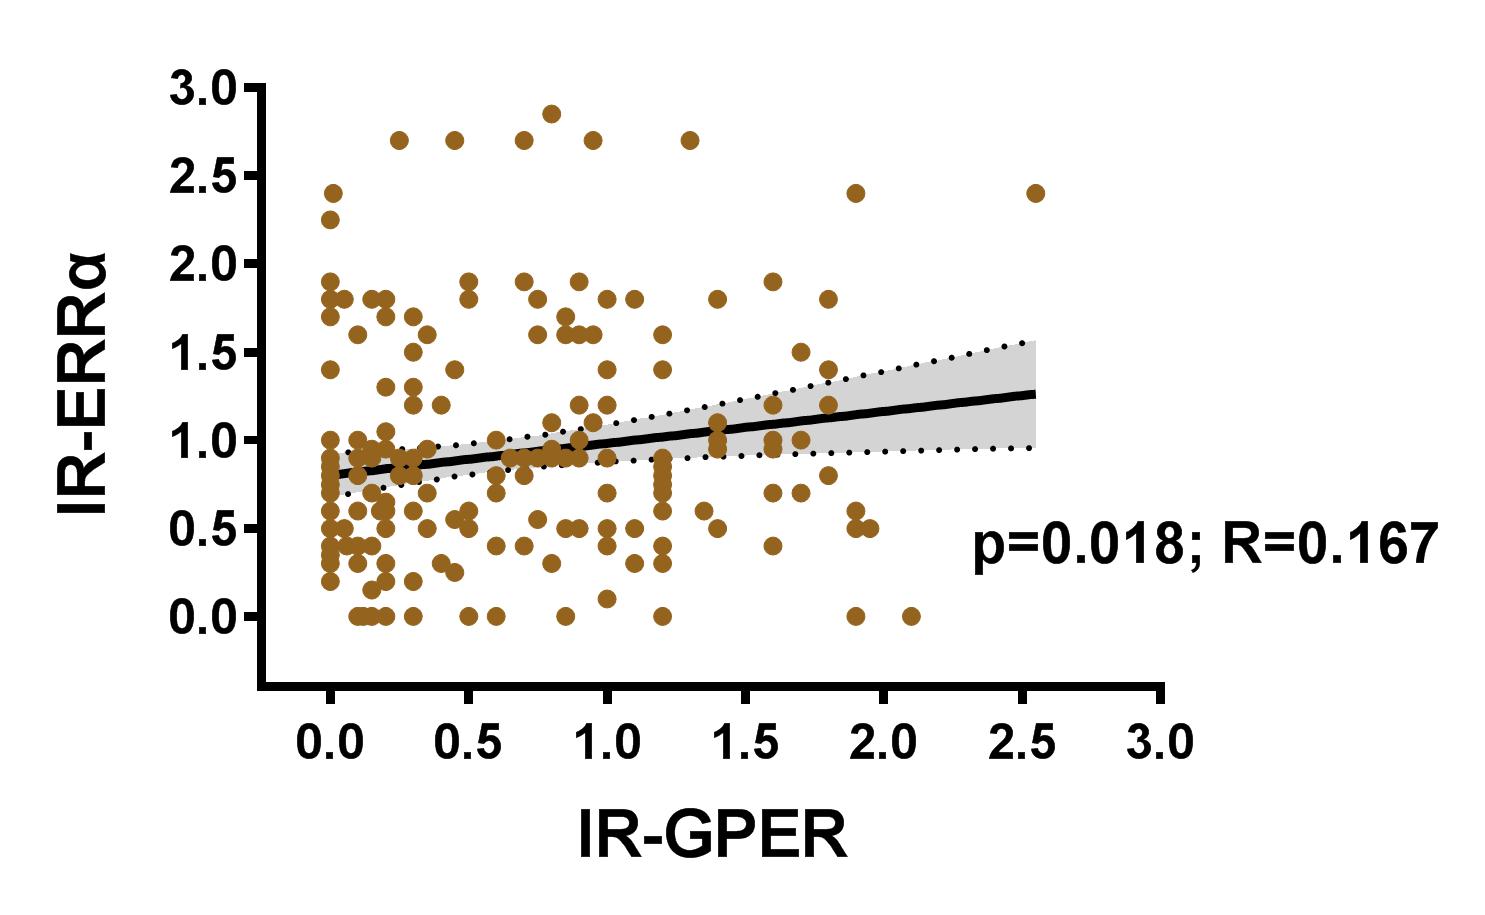
**

**Supplementary Figure 2. Survival curves of OS, LRFS, and DDFS in GPER-low and GPER-high groups.** Kaplan-Meier curves of OS (A), LRFS (B), and DDFS (C) among groups in patients with TNBC in the unmatched cohort.

**
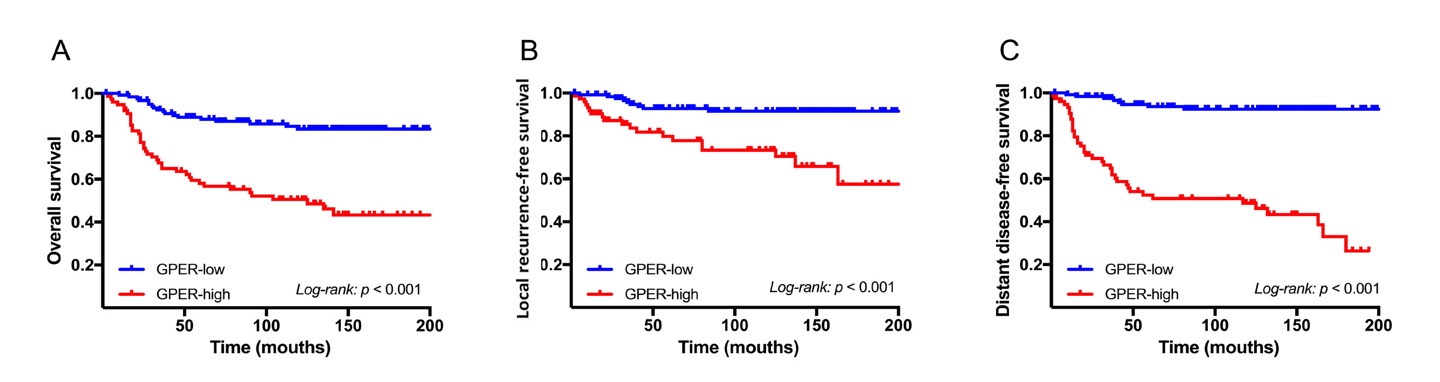
**
